# Supplementary material
Source: PubMed Central journal article supplement (PMC3815477)

Type of file: figure

Label: Figure S1

Filename: S1.pdf

Fig. S1

A

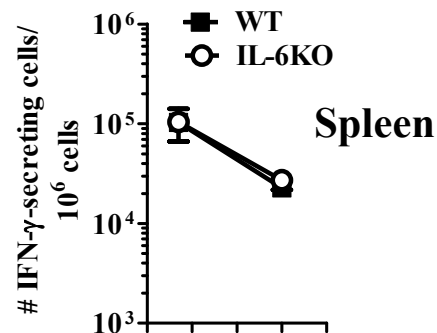

B

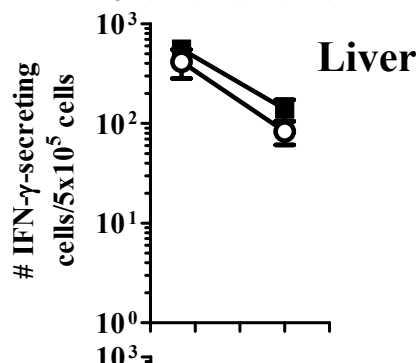

C

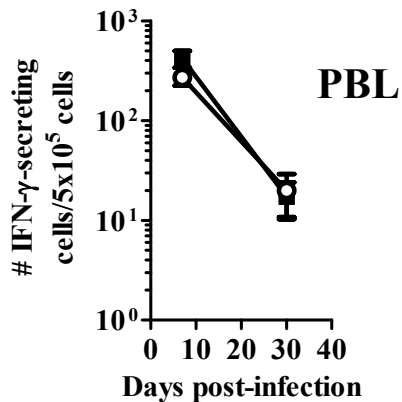

D

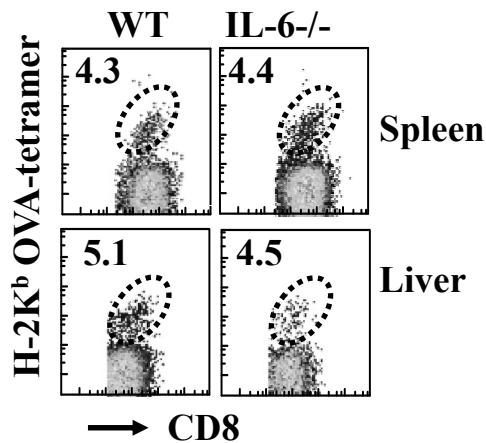

Type of file: figure

Label: Figure S2

Filename: S2.pdf

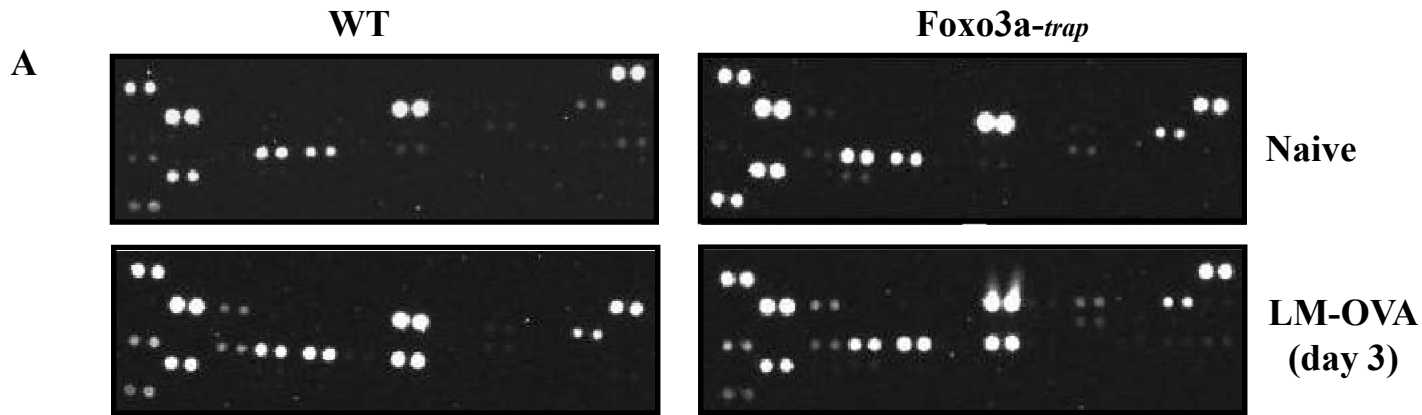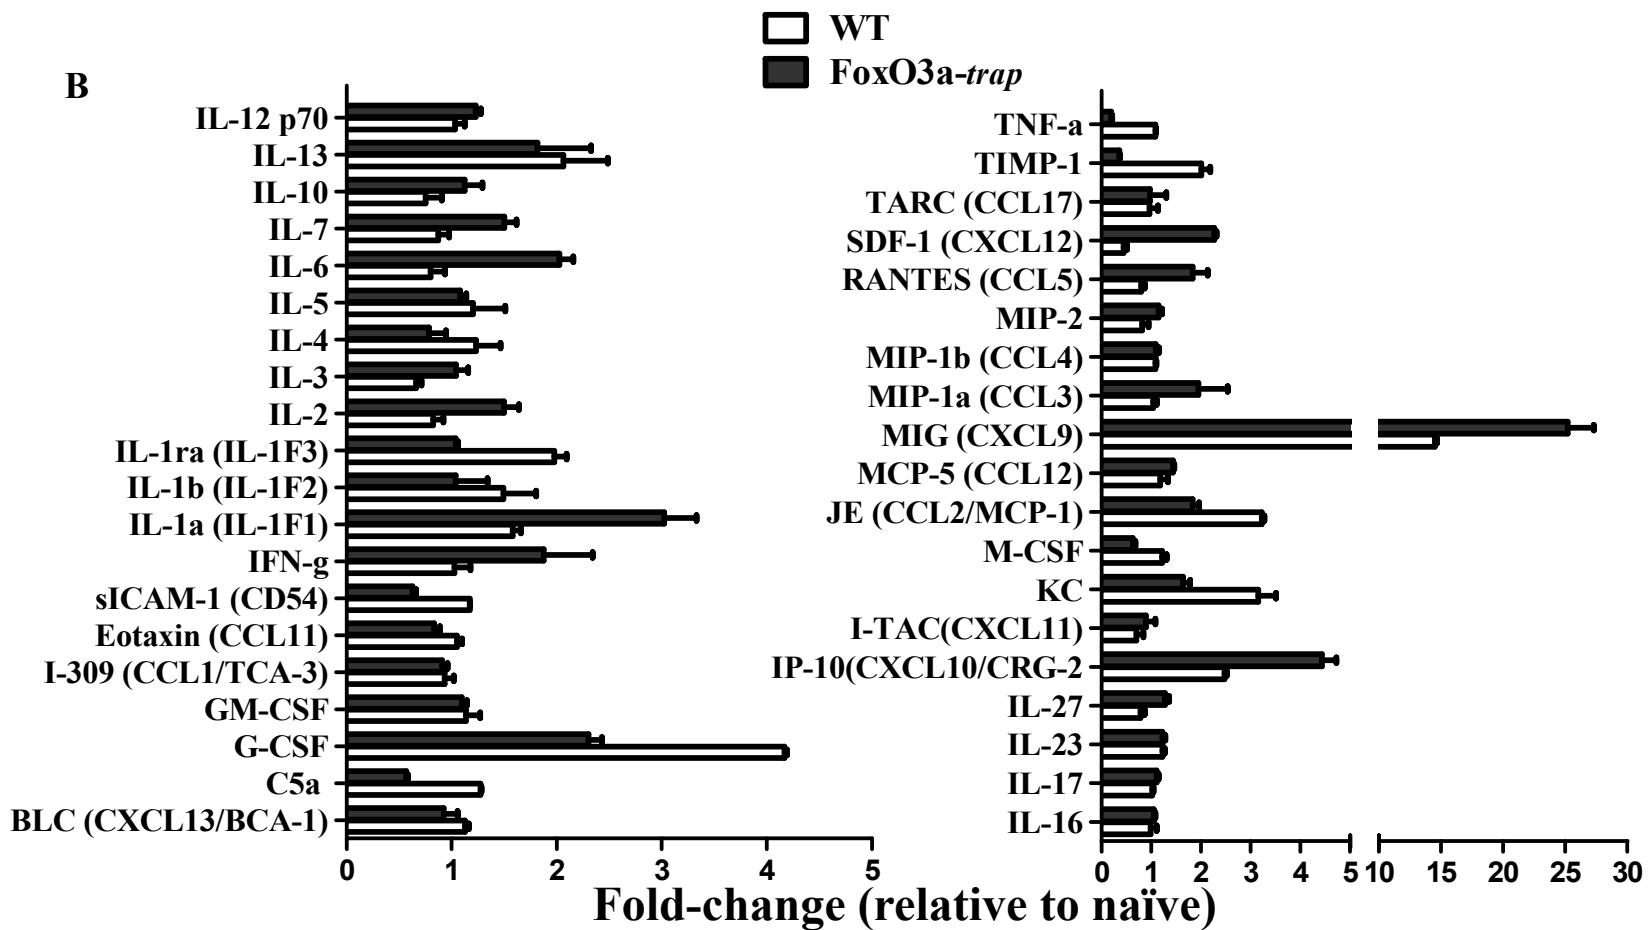

Type of file: figure

Label: Figure S3

Filename: S3.pdf

Fig. S3

A

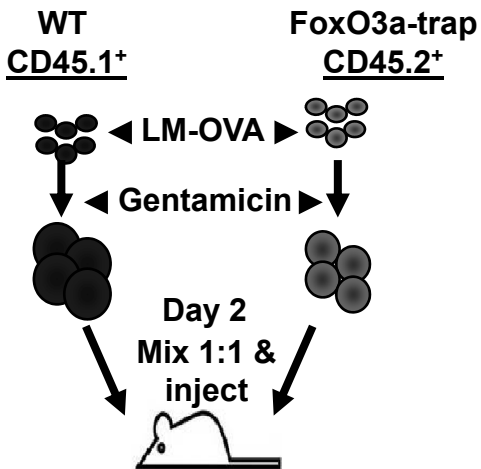

B

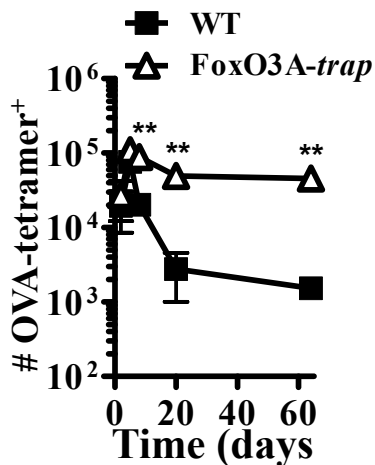

C

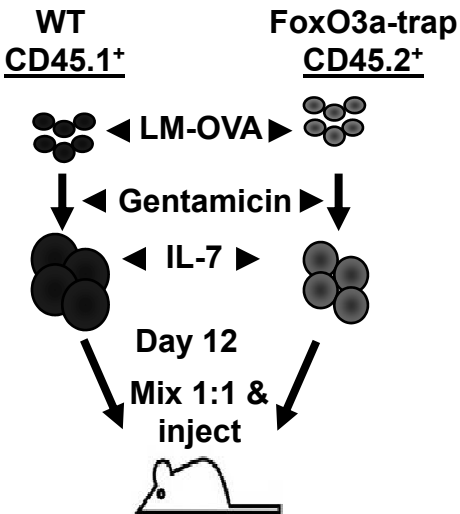

D

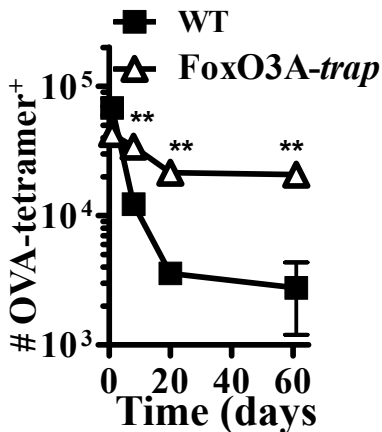

Type of file: figure

Label: Figure S4

Filename: S4.pdf

A

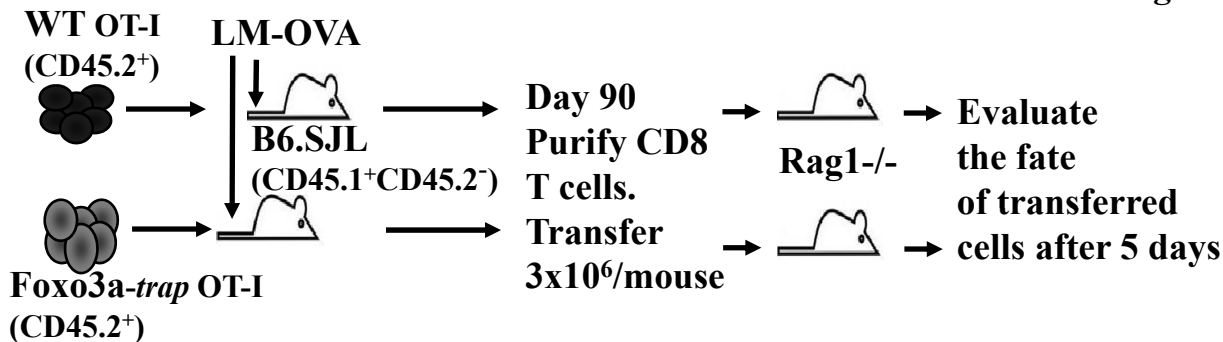

B

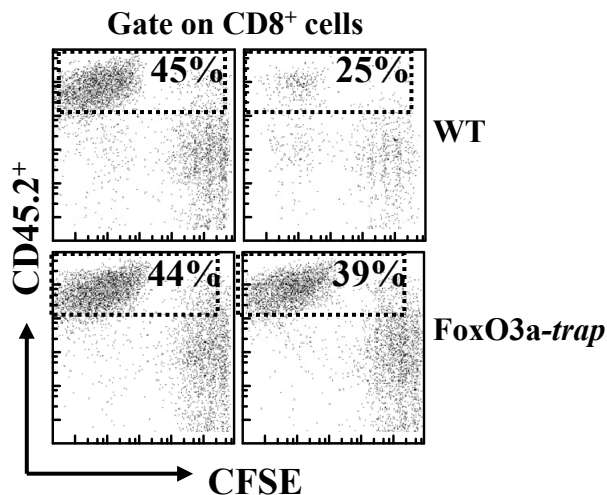

C

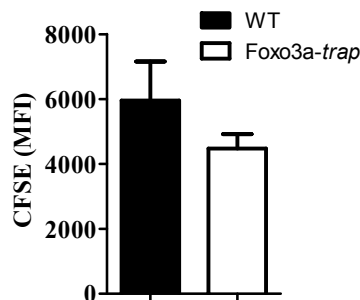

Supplement: NIHMS514189-supplement-supplement_1.pdf [file NIHMS514189-supplement-supplement_1.pdf]
